# Supplementary material for: COVID-19 pandemic-related burden and SARS-CoV-2 prevalence in care facilities
Source: Z Gerontol Geriatr. 2021 Jul 14;54(5):463–70. [Article in German] doi: 10.1007/s00391-021-01931-6 (PMC8278814; doi:10.1007/s00391-021-01931-6)
Supplement: Supplementary file 1 [file 391_2021_1931_MOESM1_ESM.pdf]

# Supplement

## Supplement 1. Fragebogen Mitarbeiter

| Seit dem Ausbruch der Covid-19-Pandemie ...                                                 | Stimme überhaupt nicht zu<br>(0) | Stimme eher nicht zu<br>(1) | Stimme teils, teils zu<br>(2) | Stimme eher zu<br>(3)    | Stimme vollständig zu<br>(4) |
|---------------------------------------------------------------------------------------------|----------------------------------|-----------------------------|-------------------------------|--------------------------|------------------------------|
| 1. ...habe ich Angst, mich zu infizieren.                                                   | <input type="checkbox"/>         | <input type="checkbox"/>    | <input type="checkbox"/>      | <input type="checkbox"/> | <input type="checkbox"/>     |
| 2. ...habe ich Angst, Angehörige oder die Familie zu infizieren.                            | <input type="checkbox"/>         | <input type="checkbox"/>    | <input type="checkbox"/>      | <input type="checkbox"/> | <input type="checkbox"/>     |
| 3. ...habe ich Angst Heimbewohner zu infizieren.                                            | <input type="checkbox"/>         | <input type="checkbox"/>    | <input type="checkbox"/>      | <input type="checkbox"/> | <input type="checkbox"/>     |
| 4. ...fühle ich mich durch die Maßnahmen des Heimes und der Behörden ausreichend geschützt. | <input type="checkbox"/>         | <input type="checkbox"/>    | <input type="checkbox"/>      | <input type="checkbox"/> | <input type="checkbox"/>     |
| 5. ...habe ich mein persönliches Hygieneverhalten verändert                                 | <input type="checkbox"/>         | <input type="checkbox"/>    | <input type="checkbox"/>      | <input type="checkbox"/> | <input type="checkbox"/>     |
| 6. ...leide ich vermehrt unter Schlafproblemen.                                             | <input type="checkbox"/>         | <input type="checkbox"/>    | <input type="checkbox"/>      | <input type="checkbox"/> | <input type="checkbox"/>     |
| 7. ...fühle bzw. verhalte ich mich deutlich gereizter, wütender, zorniger                   | <input type="checkbox"/>         | <input type="checkbox"/>    | <input type="checkbox"/>      | <input type="checkbox"/> | <input type="checkbox"/>     |
| 8. ...fühle ich mich vermehrt körperlich oder psychisch erschöpft.                          | <input type="checkbox"/>         | <input type="checkbox"/>    | <input type="checkbox"/>      | <input type="checkbox"/> | <input type="checkbox"/>     |
| 9. ...habe ich jeglichen körperlichen Kontakt zu Mitmenschen reduziert                      | <input type="checkbox"/>         | <input type="checkbox"/>    | <input type="checkbox"/>      | <input type="checkbox"/> | <input type="checkbox"/>     |
| 10. ... mache ich mir vermehrt Sorgen um die eigene finanzielle Situation                   | <input type="checkbox"/>         | <input type="checkbox"/>    | <input type="checkbox"/>      | <input type="checkbox"/> | <input type="checkbox"/>     |
| 11. ...habe meine Einstellung dazu verändert, was mir im Leben wirklich wichtig ist.        | <input type="checkbox"/>         | <input type="checkbox"/>    | <input type="checkbox"/>      | <input type="checkbox"/> | <input type="checkbox"/>     |
| 12. ...rauche ich mehr.                                                                     | <input type="checkbox"/>         | <input type="checkbox"/>    | <input type="checkbox"/>      | <input type="checkbox"/> | <input type="checkbox"/>     |
| 13. ...trinke ich mehr Alkohol.                                                             | <input type="checkbox"/>         | <input type="checkbox"/>    | <input type="checkbox"/>      | <input type="checkbox"/> | <input type="checkbox"/>     |
| 14. ...nehme ich mehr Antidepressiva/Beruhigungsmittel/Schlafmittel.                        | <input type="checkbox"/>         | <input type="checkbox"/>    | <input type="checkbox"/>      | <input type="checkbox"/> | <input type="checkbox"/>     |
| 15. ...empfinde ich die Isolierungs-Maßnahmen in unserem Pflegeheim übertrieben             | <input type="checkbox"/>         | <input type="checkbox"/>    | <input type="checkbox"/>      | <input type="checkbox"/> | <input type="checkbox"/>     |
| 16. ...empfinde ich die Situation besonders belastend für die Heimbewohner                  | <input type="checkbox"/>         | <input type="checkbox"/>    | <input type="checkbox"/>      | <input type="checkbox"/> | <input type="checkbox"/>     |
| 17. ...beeinträchtigen die getroffenen Maßnahmen meine Arbeit mit den Heimbewohnern         | <input type="checkbox"/>         | <input type="checkbox"/>    | <input type="checkbox"/>      | <input type="checkbox"/> | <input type="checkbox"/>     |
| 18. ...fühle ich mich immer gut informiert durch die Heimleitung                            | <input type="checkbox"/>         | <input type="checkbox"/>    | <input type="checkbox"/>      | <input type="checkbox"/> | <input type="checkbox"/>     |
| 19. ...habe ich die Pandemie als Realität anerkannt und akzeptiert                          | <input type="checkbox"/>         | <input type="checkbox"/>    | <input type="checkbox"/>      | <input type="checkbox"/> | <input type="checkbox"/>     |

## Supplement 2: Sonstige Symptome

### Freitextangaben der Probanden zu Sonstigen Symptomen in den letzten 2 Wochen vor Studienteilnahme

|                  | Bewohner | Mitarbeiter |
|------------------|----------|-------------|
| Müdigkeit        | 2        | 24          |
| Gliederschmerzen | 0        | 10          |
| Abgeschlagenheit | 0        | 13          |
| Appetitlosigkeit | 1        | 0           |

### Freitextangaben der Probanden zu Sonstigen Symptomen seit Februar 2020

|                  | Bewohner | Mitarbeiter |
|------------------|----------|-------------|
| Müdigkeit        | 0        | 29          |
| Gliederschmerzen | 1        | 16          |
| Abgeschlagenheit | 0        | 14          |
| Nasenbluten      | 0        | 1           |
| Ohrenschmerzen   | 0        | 2           |
| Appetitlosigkeit | 0        | 1           |
| Harnwegsinfekt   | 1        | 0           |
| Schnupfen        | 0        | 1           |
| Thrombose        | 0        | 1           |
| Schwächeanfall   | 0        | 1           |
